# Supplementary material
Source: MDPI journal article supplement (https://www.mdpi.com/2075-5309/11/11/552)
Supplement: s1 [file s1]

Supplementary Materials for the article

# Influence of Prefabricated Rate on the Environmental Performance of Buildings Based on Life Cycle Assessment

Shaozhe Wang <sup>1</sup> and Rajib Sinha <sup>2,\*</sup>

<sup>1</sup> Wuhan Engineering Consulting Bureau; Wuhan, China; wangsz16@hotmail.com

<sup>2</sup> Department of Sustainable Development, Environmental Science and Engineering (SEED), School of Architecture and the Built Environment, KTH Royal Institute of Technology Stockholm, Teknikringen 10B, 100 44 Stockholm, Sweden

\* Correspondence: rajibs@kth.se; Tel.: +46-8-790 63

**Supplementary Materials:** The following are available online at [www.mdpi.com/xxx/s](http://www.mdpi.com/xxx/s),

S1: Data collection for the reference building

S2: Data for the scenarios with increasing prefabricated rates

S3: Data for sensitivity analysis

S4: Data for uncertainty analysis

**Citation:** Wang, S.; Sinha, R.  
Influence of Prefabricated Rate on  
the Environmental Performance of  
Buildings Based on Life Cycle  
Assessment. *Buildings* **2021**, *11*, 552.  
[https://doi.org/10.3390/  
buildings11110552](https://doi.org/10.3390/buildings11110552)

Academic Editor: Baojie He

Received: 24 October 2021

Accepted: 12 November 2021

Published: 17 November 2021

**Publisher's Note:** MDPI stays neutral with regard to jurisdictional claims in published maps and institutional affiliations.

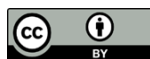

**Copyright:** © 2021 by the authors.  
Licensee MDPI, Basel, Switzerland.  
This article is an open access article  
distributed under the terms and  
conditions of the Creative Commons  
Attribution (CC BY) license  
([http://creativecommons.org/licenses  
/by/4.0/](http://creativecommons.org/licenses/by/4.0/)).

## Supplementary Materials

## S1: Data collection for the reference building

Table S1.1: Raw material consumption per m<sup>2</sup> floor area considering loss rates for the reference building

| Work type                  | Material type                            | Raw material                     | Consumption             | Reference |
|----------------------------|------------------------------------------|----------------------------------|-------------------------|-----------|
| Precast concrete work      | Precast concrete<br>(loss rate: 4%)      | Cement                           | 20.75 kg/m <sup>2</sup> | [1, 2]    |
|                            |                                          | Sand                             | 132.8 kg/m <sup>2</sup> |           |
|                            |                                          | Gravel                           | 74.71 kg/m <sup>2</sup> |           |
|                            | Reinforcement bars                       | Recycled steel                   | 6.083 kg/m <sup>2</sup> | [3]       |
| Conventional concrete work | Ready-mixed concrete<br>(loss rate: 10%) | Cement                           | 63.99 kg/m <sup>2</sup> | [1, 3]    |
|                            |                                          | Sand                             | 409.5 kg/m <sup>2</sup> |           |
|                            |                                          | Gravel                           | 230.3 kg/m <sup>2</sup> |           |
|                            | Reinforcement bars                       | Recycled steel                   | 17.58 kg/m <sup>2</sup> |           |
| Other material work        | Metal                                    | Steel, virgin                    | 1.510 kg/m <sup>2</sup> | [3]       |
|                            |                                          | Stainless steel                  | 0.582 kg/m <sup>2</sup> |           |
|                            |                                          | Aluminium, virgin                | 0.549 kg/m <sup>2</sup> |           |
|                            |                                          | Aluminium, recycled              | 0.549 kg/m <sup>2</sup> |           |
|                            | Wood                                     | Planed timber                    | 9.780 kg/m <sup>2</sup> |           |
|                            |                                          | Plywood                          | 0.698 kg/m <sup>2</sup> |           |
|                            |                                          | Plasterboard<br>(loss rate: 4%)  | 4.646 kg/m <sup>2</sup> |           |
|                            |                                          | Glued-laminated timber           | 11.83 kg/m <sup>2</sup> |           |
|                            |                                          | Particle board                   | 0.880 kg/m <sup>2</sup> |           |
|                            | Mineral wool                             | Stone wool<br>(loss rate: 7%)    | 6.796 kg/m <sup>2</sup> |           |
|                            | Plastics                                 | Polypropylene<br>(loss rate: 7%) | 2.118 kg/m <sup>2</sup> |           |
|                            |                                          | Polystyrene                      | 7.022 kg/m <sup>2</sup> |           |
|                            | Glass                                    | Glass                            | 4.118 kg/m <sup>2</sup> |           |
|                            |                                          | Insulated glass unit             | 4.340 kg/m <sup>2</sup> |           |

**Table S1.2: Total material and energy consumption per m<sup>2</sup> floor area for the reference building during in-plant processing**

| Work type                  | Material/ energy         | The reference building   | Reference |
|----------------------------|--------------------------|--------------------------|-----------|
| Conventional concrete work | Electricity              | 1.728 kwh/m <sup>2</sup> | [4]       |
|                            | Water                    | 39.35 kg/m <sup>2</sup>  | [5]       |
| Precast concrete work      | Electricity for concrete | 0.561 kwh/m <sup>2</sup> | [4]       |
|                            | Electricity for steel    | 0.270 kwh/m <sup>2</sup> | [6]       |
|                            | Water                    | 12.76 kg/m <sup>2</sup>  | [5]       |
|                            | Diesel                   | 1.113 kwh/m <sup>2</sup> | [7]       |
|                            | Steam                    | 2.167 kwh/m <sup>2</sup> | [8]       |

**Table S1.3: Transport information for sand and gravel of the reference building, from raw material suppliers to concrete plants**

| Work types                 | Concrete plants | Suppliers                          | Geographic al distance | Average distance | Transport distance | Reference |
|----------------------------|-----------------|------------------------------------|------------------------|------------------|--------------------|-----------|
| Conventional concrete work | Täby            | Sand & Grus AB Jehander - Ulvsunda | 16.6 km                | 13.68 km         | 8753 kg × km       | [3, 9]    |
|                            | Värtan          |                                    | 10.5 km                |                  |                    |           |
|                            | Hammarby        |                                    | 10.2 km                |                  |                    |           |
|                            | Sollentuna      |                                    | 17.4 km                |                  |                    |           |
| Precast concrete work      | Kviksund        | Abetong AB                         | 0.8 km                 | 8.867 km         | 1840 kg × km       |           |
|                            | Hallstahammar   | Swerock AB                         | 11.8 km                |                  |                    |           |
|                            | Nykvarn         |                                    | 14 km                  |                  |                    |           |

**Table S1.4: Transport information for reinforcement bars of the reference building**

| Work types                 | Recycled steel processing plant | Construction site / Prefabrication plant | Average distance                | Transport distance                                   | Reference |
|----------------------------|---------------------------------|------------------------------------------|---------------------------------|------------------------------------------------------|-----------|
| Conventional concrete work | Factory in Latvia               | Stockholm Royal Seaport                  | 500 km by ship<br>8 km by truck | 8790 kg × km by ship<br>140.6 kg × km by truck       | [3]       |
| Precast concrete work      | Factory in Latvia               | Kviksund                                 | 500 km by ship                  | 3041.293 kg × km by ship<br>637.656 kg × km by truck |           |
|                            |                                 | Hallstahammar                            | 104.8 km by                     |                                                      |           |
|                            |                                 | Nykvarn                                  | truck                           |                                                      |           |

**Table S1.5: Transport information for ready-mixed concrete and precast concrete components of the reference building, from concrete plants to construction site**

| Work types                 | Concrete plants | Construction site             | Average distance | Transport distance | Reference |
|----------------------------|-----------------|-------------------------------|------------------|--------------------|-----------|
| Conventional concrete work | Täby            | Stockholm<br>Royal<br>Seaport | 11 km            | 8478 kg × km       | [3]       |
|                            | Värtan          |                               |                  |                    |           |
|                            | Hammarby        |                               |                  |                    |           |
|                            | Sollentuna      |                               |                  |                    |           |
| Precast concrete work      | Kvicksund       |                               | 90 km            | 23050 kg × km      |           |
|                            | Hallstahammar   |                               |                  |                    |           |
|                            | Nykvarn         |                               |                  |                    |           |

**Table S1.6: Transport distance between material processing factories to construction site for other building materials**

| Materials            | Location                                   | Geographical distance | Transport distance   | Reference |
|----------------------|--------------------------------------------|-----------------------|----------------------|-----------|
| Steel, virgin        | Factory in Nora                            | 230 km on road        | Truck: 307.6 kg × km | [3]       |
|                      | Factory in Bastad                          | 540 km on road        | Truck: 96.69 kg × km |           |
| Stainless steel      | Factory in Latvia                          | 500 km on sea         | Truck: 4.658 kg × km |           |
|                      |                                            | 8 km on road          | Ship: 291.1 kg × km  |           |
| Aluminium, virgin    | Factory in Finstång                        | 200 km on road        | Truck: 109.8 kg × km |           |
| Aluminium, recycled  |                                            |                       | Truck: 109.8 kg × km |           |
| Planed timber        |                                            |                       | Truck: 4890 kg × km  |           |
| Plywood              |                                            |                       | Truck: 349.0 kg × km |           |
| Particle board       | Factories in<br>Töreboda and<br>Bygdsiljum | 500 km on road        | Truck: 440.0 kg × km |           |
| Glulam               |                                            |                       | Truck: 5916 kg × km  |           |
| Plasterboard         | Factory in Balsta                          | 560 km on road        | Truck: 232.3 kg × km |           |
| Stone wool           | Factories in<br>Hällekis and<br>Skövde     | 340 km on road        | Truck: 2310 kg × km  |           |
| PP/PE                | Factory in Spånga                          | 15 km on road         | Truck: 31.78 kg × km |           |
| PS                   | Factory in<br>Vårgårda                     | 430 km on road        | Truck: 3020 kg × km  |           |
| Glass                | Factories in<br>Jönköping and<br>Edsbyn    | 315 km on road        | Truck: 1297 kg × km  |           |
| IGU                  |                                            |                       | Truck: 1367 kg × km  |           |
| Coating cement board | Factory in Muijala,<br>Finland             | 300 km on sea         | Truck: 87.35 kg × km |           |
|                      |                                            | 124 km on road        | Ship: 211.33 kg × km |           |

**Table S1.7: Total material and energy consumption per m<sup>2</sup> floor area for the reference building during on-site work**

| Work type                  | Material/ energy | The reference building    | Reference   |
|----------------------------|------------------|---------------------------|-------------|
| Conventional concrete work | Electricity      | 0.831 kwh/m <sup>2</sup>  | [4]         |
|                            | Diesel           | 7.122 kg/m <sup>2</sup>   |             |
| Precast concrete work      | Diesel           | 0.3489 kwh/m <sup>2</sup> | [4, 10, 11] |

**S2: Data for the scenarios with increasing prefabricated rates****Table S2.1: Total raw material consumption per m<sup>2</sup> floor area considering loss rates for the scenarios (kg/m<sup>2</sup>)**

| Work type                  | Materials      | S1    | S2    | S3    | S4    | S5    | S6    | S7    | S8    | S9    | Reference |
|----------------------------|----------------|-------|-------|-------|-------|-------|-------|-------|-------|-------|-----------|
| Conventional concrete work | Cement         | 80.95 | 72.34 | 55.12 | 46.50 | 37.89 | 29.28 | 20.67 | 12.05 | 3.445 | [1]       |
|                            | Sand           | 518.1 | 463.0 | 352.8 | 297.6 | 242.5 | 187.4 | 132.3 | 77.15 | 22.05 |           |
|                            | Gravel         | 291.4 | 260.4 | 198.4 | 167.4 | 136.4 | 105.4 | 74.42 | 43.40 | 12.40 |           |
|                            | Recycled steel | 22.24 | 19.88 | 15.15 | 12.78 | 10.41 | 8.046 | 5.679 | 3.313 | 0.947 | [3]       |
| Precast concrete work      | Cement         | 4.844 | 12.92 | 29.07 | 37.14 | 45.21 | 53.28 | 61.36 | 69.44 | 77.5  | [1]       |
|                            | Sand           | 31.00 | 82.69 | 186.0 | 237.7 | 289.4 | 341.0 | 392.7 | 444.4 | 496.0 |           |
|                            | Gravel         | 17.44 | 46.51 | 104.6 | 133.7 | 162.8 | 191.8 | 220.9 | 250.0 | 279.0 |           |
|                            | Recycled steel | 1.420 | 3.786 | 6.084 | 8.519 | 10.89 | 13.25 | 15.62 | 17.98 | 20.35 | [3]       |

**Table S2.2: Total material and energy consumption per m<sup>2</sup> floor area for the scenarios during in-plant processing**

| Work type                  | Material/energy                   | S1     | S2     | S3    | S4    | S5    | S6     | S7     | S8     | S9    | Reference |
|----------------------------|-----------------------------------|--------|--------|-------|-------|-------|--------|--------|--------|-------|-----------|
| Conventional concrete work | Electricity (kwh/m <sup>2</sup> ) | 2.186  | 1.953  | 1.488 | 1.256 | 1.023 | 0.7906 | 0.5582 | 0.3255 | 0.093 | [4]       |
|                            | Water (kg/m <sup>2</sup> )        | 49.78  | 44.49  | 33.90 | 28.60 | 23.30 | 18.01  | 12.71  | 7.414  | 2.118 | [5]       |
| Precast concrete work      | Electricity (kwh/m <sup>2</sup> ) | 0.1939 | 0.5171 | 1.163 | 1.487 | 1.810 | 2.133  | 2.456  | 2.779  | 3.103 | [6]       |
|                            | Water (kg/m <sup>2</sup> )        | 2.979  | 7.946  | 17.88 | 22.84 | 27.81 | 32.77  | 37.74  | 42.70  | 47.67 | [5]       |
|                            | Diesel (kWh/m <sup>2</sup> )      | 0.2596 | 0.6926 | 1.558 | 1.991 | 2.423 | 2.856  | 3.289  | 3.722  | 4.154 | [7]       |
|                            | Steam (kWh/m <sup>2</sup> )       | 0.5059 | 1.349  | 3.036 | 3.878 | 4.722 | 5.565  | 6.408  | 7.252  | 8.095 | [8]       |

**Table S2.3: Transport distance between sand and gravel processing plants and concrete plants for the scenarios (kg × km/m<sup>2</sup>)**

| Work types                 | S1    | S2   | S3   | S4   | S5   | S6   | S7   | S8   | S9    | Reference |
|----------------------------|-------|------|------|------|------|------|------|------|-------|-----------|
| Conventional concrete work | 11070 | 9896 | 7540 | 6361 | 5184 | 4006 | 2828 | 1649 | 471.2 | [9]       |
| Precast concrete work      | 429.5 | 1146 | 2577 | 3293 | 4009 | 4724 | 5441 | 6157 | 6872  |           |

**Table S2.4: Transport distance between concrete plants to construction site for the scenarios (kg × km/m²)**

| Work types                                         | S1    | S2    | S3    | S4    | S5    | S6    | S7    | S8    | S9    | Reference |
|----------------------------------------------------|-------|-------|-------|-------|-------|-------|-------|-------|-------|-----------|
| Ready-mixed concrete in conventional concrete work | 10730 | 9584  | 8478  | 7303  | 6161  | 5020  | 3880  | 2739  | 1597  | [3]       |
| Precast components in precast concrete work        | 5379  | 14350 | 23050 | 32280 | 41240 | 50210 | 59170 | 68130 | 77100 |           |

**Table S2.5: Transport distance for recycled steels of the scenarios (kg × km/m²)**

| Work types                 | Transport section          | S1    | S2    | S3    | S4    | S5    | S6    | S7    | S8    | S9    | Reference |
|----------------------------|----------------------------|-------|-------|-------|-------|-------|-------|-------|-------|-------|-----------|
| Conventional concrete work | Supplier to Stockholm port | 11120 | 9940  | 7575  | 6390  | 5205  | 4023  | 2840  | 1657  | 473.3 | [3]       |
|                            | Stockholm port to site     | 177.9 | 159.0 | 121.2 | 102.2 | 83.28 | 64.37 | 45.43 | 26.50 | 7.573 | [9]       |
| Precast concrete work      | Supplier to Stockholm port | 710.0 | 1893  | 3042  | 4260  | 5445  | 6625  | 7810  | 8990  | 10180 | [3]       |
|                            | Stockholm port to factory  | 148.8 | 396.8 | 637.6 | 892.8 | 1141  | 1389  | 1637  | 1884  | 2133  | [9]       |

**Table S2.6: Total energy consumption of conventional and precast concrete work for the scenarios during on-site work (kWh/m²)**

| Work types                 | Energy      | S1    | S2    | S3     | S4     | S5     | S6     | S7    | S8    | S9     | Reference |
|----------------------------|-------------|-------|-------|--------|--------|--------|--------|-------|-------|--------|-----------|
| Conventional concrete work | Diesel      | 9.009 | 8.051 | 6.135  | 5.176  | 4.217  | 3.259  | 2.301 | 1.342 | 0.3834 | [4]       |
|                            | Electricity | 1.023 | 0.915 | 0.697  | 0.588  | 0.479  | 0.370  | 0.261 | 0.152 | 0.0435 |           |
| Precast concrete work      | Diesel      | 0.081 | 0.217 | 0.4886 | 0.6242 | 0.7599 | 0.8956 | 1.031 | 1.167 | 1.303  | [10, 11]  |

**Table S2.7: Datasets chosen for the LCA model in SimaPro**

| Materials/Energy/Process | Datasets                                                                                                                                       |
|--------------------------|------------------------------------------------------------------------------------------------------------------------------------------------|
| Gravel                   | Gravel, round {RoW}   Cut-off, U                                                                                                               |
| Sand                     | Sand {GLO}   market for   Cut-off, U                                                                                                           |
| Cement                   | Cement, alternative constituents 6-20% {Europe without Switzerland}   production   Cut-off, U                                                  |
| Recycled steel           | Steel, unalloyed {RoW}   recycled content   Cut-off, U                                                                                         |
| Electricity              | Electricity, medium voltage {SE}   market for   Cut-off, U                                                                                     |
| Water                    | Tap water {Europe without Switzerland}   market for   Cut-off, U                                                                               |
| Diesel                   | Diesel, burned in building machine {GLO}   processing   Cut-off, U                                                                             |
| Steam                    | Steam, in chemical industry {RER}   production   Cut-off, U                                                                                    |
| Light-duty truck         | Transport, freight, lorry 3.5-7.5 metric ton, EURO6 {RER}   transport, freight, lorry 7.5-16 metric ton, EURO6   Cut-off, U                    |
| Heavy-duty truck         | Transport, freight, lorry 7.5-16 metric ton, EURO6 {RER}   transport, freight, lorry 3.5-7.5 metric ton, EURO6   Cut-off, U                    |
| Ship                     | Transport, freight, sea, transoceanic ship {GLO}   processing   Cut-off, U                                                                     |
| Steel, virgin            | Steel, unalloyed {RoW}   steel production, converter, unalloyed   Cut-off, U                                                                   |
| Stainless steel          | Reinforcing steel {RER}   production   Cut-off, U                                                                                              |
| Aluminium, virgin        | Aluminium, primary, cast alloy slab from continuous casting {RoW}   production   Cut-off, U                                                    |
| Aluminium, recycled      | Aluminium scrap, new {GLO}   recycled content   cut-off, U                                                                                     |
| Planed timber            | Laminated timber element, transversally prestressed, for outdoor use {RER}   laminated timber element production, for outdoor use   Cut-off, U |
| Plywood                  | Plywood, for outdoor use {RER}   production   Cut-off, U                                                                                       |
| Plasterboard             | Gypsum plasterboard {RoW}   production   Cut-off, U                                                                                            |
| Glulam                   | Glued laminated timber, for outdoor use {RER}   production   Cut-off, U                                                                        |
| Particle board           | Particle board, for outdoor use {RER}   production   Cut-off, U                                                                                |
| Stone wool               | Stone wool {RoW}   stone wool production   Cut-off, U                                                                                          |
| Polypropylene            | Polypropylene, granulate {RER}   production   Cut-off, U                                                                                       |
| Polystyrene              | Polystyrene foam slab {RER}   production   Cut-off, U                                                                                          |
| Glass                    | Flat glass, uncoated {RER}   production   Cut-off, U                                                                                           |
| IGU                      | Foam glass {GLO}   production, without cullet   Cut-off, U                                                                                     |



**S3: Data for sensitivity analysis****New supplier information and new geographical transport distance for raw materials, recycled steels and precast components:**

- (1) New raw material supplier: Sand & Grus AB Jehander – Ulvsunda. Distance between raw material supplier and prefabrication factory WAMA AB: 2.3 km
- (2) Distance between recycled steel supplier and prefabrication factory: 500 km on sea and 10.6 km on road.
- (3) Distance between prefabrication factory and construction site: 10.6 km (SeaRates, 2020).

**Table S3.1: Transport distances for the reference building and scenarios (kg × km/m<sup>2</sup>) [9]**

| Suppliers          | Transport types             | S1    | S2    | RB    | S3    | S4    | S5    | S6    | S7    | S8    | S9    |
|--------------------|-----------------------------|-------|-------|-------|-------|-------|-------|-------|-------|-------|-------|
| Original suppliers | Raw material transport      | 429.5 | 1146  | 1840  | 2577  | 3293  | 4009  | 4724  | 5441  | 6157  | 6872  |
|                    | Steel transport (truck)     | 148.8 | 396.8 | 637.6 | 892.8 | 1141  | 1389  | 1637  | 1884  | 2133  | 2381  |
|                    | Precast component transport | 5379  | 14350 | 23050 | 32280 | 41240 | 50210 | 59170 | 68130 | 77100 | 86060 |
| New supplier       | Raw material transport      | 111.4 | 297.2 | 477.4 | 668.5 | 854.1 | 1040  | 1225  | 1411  | 1597  | 1783  |
|                    | Steel transport (truck)     | 15.05 | 40.13 | 64.49 | 90.3  | 115.4 | 140.5 | 165.6 | 190.6 | 215.7 | 240.8 |
|                    | Precast component transport | 633.5 | 1690  | 2714  | 3801  | 4857  | 5913  | 6968  | 8025  | 9081  | 10140 |

**S4: Data for uncertainty analysis****Table S4.1: Environmental impact results with the minimum value of uncertain on-site material loss rate for precast concrete** (Results from SimaPro version 9)

|                                                          | S1     | S2     | RB     | S3     | S4     | S5     | S6     | S7     | S8     | S9     |
|----------------------------------------------------------|--------|--------|--------|--------|--------|--------|--------|--------|--------|--------|
| Energy footprint (MJ/m <sup>2</sup> )                    | 648.6  | 674.6  | 699.8  | 726.5  | 752.3  | 778.3  | 804.1  | 830.1  | 856.1  | 882    |
| Energy footprint changing                                | -0.09% | -0.21% | -0.33% | -0.44% | -0.54% | -0.64% | -0.73% | -0.81% | -0.88% | -0.94% |
| Carbon footprint (kg CO <sub>2</sub> eq/m <sup>2</sup> ) | 87.87  | 89.15  | 90.4   | 91.71  | 92.96  | 94.25  | 95.52  | 96.8   | 98.07  | 99.35  |
| Carbon footprint changing                                | -0.07% | -0.18% | -0.29% | -0.39% | -0.51% | -0.60% | -0.70% | -0.80% | -0.89% | -0.95% |
| Water footprint (m <sup>3</sup> /m <sup>2</sup> )        | 1.502  | 1.496  | 1.491  | 1.485  | 1.479  | 1.473  | 1.467  | 1.461  | 1.455  | 1.449  |
| Water footprint changing                                 | -0.07% | -0.20% | -0.20% | -0.34% | -0.47% | -0.54% | -0.68% | -0.81% | -0.89% | -1.02% |
| Terrestrial ecotoxicity (kg 1,4-DCB/m <sup>2</sup> )     | 175.7  | 192.9  | 209.7  | 227.5  | 244.7  | 262    | 279.3  | 296.6  | 313.9  | 331.1  |
| Terrestrial ecotoxicity changing                         | -0.11% | -0.31% | -0.43% | -0.52% | -0.65% | -0.72% | -0.78% | -0.84% | -0.92% | -0.96% |

**Table S4.2: Environmental impact results with the maximum value of uncertain on-site material loss rate for precast concrete** (Results from SimaPro version 9)

|                                                          | S1     | S2     | RB     | S3     | S4     | S5     | S6     | S7     | S8     | S9     |
|----------------------------------------------------------|--------|--------|--------|--------|--------|--------|--------|--------|--------|--------|
| Energy footprint (MJ/m <sup>2</sup> )                    | 649.7  | 677.5  | 704.4  | 732.9  | 760.6  | 788.3  | 816    | 843.7  | 871.5  | 899.2  |
| Energy footprint changing                                | +0.08% | +0.22% | +0.33% | +0.44% | +0.56% | +0.64% | +0.74% | +0.81% | +0.90% | +0.99% |
| Carbon footprint (kg CO <sub>2</sub> eq/m <sup>2</sup> ) | 87.99  | 89.48  | 90.92  | 92.44  | 93.92  | 95.4   | 96.88  | 98.36  | 99.85  | 101.3  |
| Carbon footprint changing                                | +0.07% | +0.19% | +0.29% | +0.40% | +0.51% | +0.61% | +0.72% | +0.80% | +0.91% | +1.00% |
| Water footprint (m <sup>3</sup> /m <sup>2</sup> )        | 1.504  | 1.501  | 1.498  | 1.496  | 1.493  | 1.49   | 1.487  | 1.484  | 1.481  | 1.479  |
| Water footprint changing                                 | +0.07% | +0.13% | +0.27% | +0.40% | +0.47% | +0.61% | +0.68% | +0.75% | +0.89% | +1.02% |
| Terrestrial ecotoxicity (kg 1,4-DCB/m <sup>2</sup> )     | 176.1  | 194    | 211.4  | 229.9  | 247.9  | 265.8  | 283.8  | 301.7  | 319.7  | 337.7  |
| Terrestrial ecotoxicity changing                         | +0.11% | +0.26% | +0.38% | +0.52% | +0.65% | +0.72% | +0.82% | +0.87% | +0.92% | +1.02% |

**Table S4.3: Environmental impact results with the minimum value of uncertain on-site energy consumption for precast concrete** (Results from SimaPro version 9)

|                                                          | S1     | S2     | RB     | S3     | S4     | S5     | S6     | S7     | S8     | S9     |
|----------------------------------------------------------|--------|--------|--------|--------|--------|--------|--------|--------|--------|--------|
| Energy footprint (MJ/m <sup>2</sup> )                    | 649.1  | 675.7  | 701.5  | 728.8  | 755.3  | 781.9  | 808.5  | 835.1  | 861.7  | 888.2  |
| Energy footprint changing                                | -0.02% | -0.04% | -0.09% | -0.12% | -0.15% | -0.18% | -0.19% | -0.22% | -0.23% | -0.25% |
| Carbon footprint (kg CO <sub>2</sub> eq/m <sup>2</sup> ) | 87.93  | 89.29  | 90.62  | 92.02  | 93.37  | 94.73  | 96.09  | 97.46  | 98.82  | 100.2  |
| Carbon footprint changing                                | 0.00%  | -0.02% | -0.04% | -0.05% | -0.07% | -0.09% | -0.10% | -0.12% | -0.13% | -0.10% |
| Water footprint (m <sup>3</sup> /m <sup>2</sup> )        | 1.503  | 1.499  | 1.494  | 1.49   | 1.485  | 1.481  | 1.477  | 1.472  | 1.468  | 1.463  |
| Water footprint changing                                 | 0.00%  | 0.00%  | 0.00%  | 0.00%  | -0.07% | 0.00%  | 0.00%  | -0.07% | 0.00%  | -0.07% |
| Terrestrial ecotoxicity (kg 1,4-DCB/m <sup>2</sup> )     | 175.9  | 193.5  | 210.5  | 228.7  | 246.2  | 263.9  | 281.4  | 299    | 316.6  | 334.2  |
| Terrestrial ecotoxicity changing                         | 0.00%  | 0.00%  | -0.05% | 0.00%  | -0.04% | 0.00%  | -0.04% | -0.03% | -0.06% | -0.03% |

**Table S4.4: Environmental impact results with the maximum value of uncertain on-site energy consumption for precast concrete** (Results from SimaPro version 9)

|                                                          | S1     | S2     | RB     | S3     | S4     | S5     | S6     | S7     | S8     | S9     |
|----------------------------------------------------------|--------|--------|--------|--------|--------|--------|--------|--------|--------|--------|
| Energy footprint (MJ/m <sup>2</sup> )                    | 649.4  | 676.4  | 702.7  | 730.5  | 757.5  | 784.6  | 811.6  | 838.6  | 865.7  | 892.7  |
| Energy footprint changing                                | +0.03% | +0.06% | +0.09% | +0.11% | +0.15% | +0.17% | +0.20% | +0.20% | +0.23% | +0.26% |
| Carbon footprint (kg CO <sub>2</sub> eq/m <sup>2</sup> ) | 87.94  | 89.34  | 90.7   | 92.13  | 93.51  | 94.9   | 96.29  | 97.69  | 99.08  | 100.5  |
| Carbon footprint changing                                | +0.01% | +0.03% | +0.04% | +0.07% | +0.07% | +0.08% | +0.10% | +0.11% | +0.13% | +0.20% |
| Water footprint (m <sup>3</sup> /m <sup>2</sup> )        | 1.503  | 1.499  | 1.494  | 1.49   | 1.485  | 1.481  | 1.477  | 1.472  | 1.468  | 1.463  |
| Water footprint changing                                 | 0.00%  | 0.00%  | +0.07% | 0.00%  | 0.00%  | 0.00%  | 0.00%  | 0.00%  | 0.00%  | 0.00%  |
| Terrestrial ecotoxicity (kg 1,4-DCB/m <sup>2</sup> )     | 1.503  | 1.499  | 1.495  | 1.49   | 1.486  | 1.481  | 1.477  | 1.473  | 1.468  | 1.464  |
| Terrestrial ecotoxicity changing                         | 0.00%  | 0.00%  | 0.00%  | +0.04% | +0.04% | +0.04% | +0.04% | +0.03% | +0.03% | +0.06% |

## References

1. Centre for environmental assessment of product and material systems, *Life cycle inventory data*. (Online). . Available at: <http://www.cpmdatabase.cpm.chalmers.se/Start.asp> (Accessed 5 February 2020). 1997.
2. Kim, D., *Preliminary Life Cycle Analysis of Modular and Conventional Housing in Benton Harbor, MI*. 2008.
3. Stockholmshem, *Markanvisningstävling plusenergihus i NDS etapp Brofästet*. (Pdf). An internal report at the City of Stockholm. 2012.
4. He, X., *The Research of Energy Consumption and Energy Conservation in Construction Technology*. Master Thesis. Chongqing University., 2013.
5. Weidema, B.P., et al., *Overview and methodology: Data quality guideline for the ecoinvent database version 3*. 2013.
6. Kim, N.-w. and J.-s. Bae, *A fundamental study on the characteristics of concrete with the substitution ratio of the rapidly cooled steel slag*. Journal of the Korea institute for structural maintenance and inspection, 2009. **13**(1): p. 78-87.
7. Kim, T. and C.U. Chae, *Evaluation analysis of the CO2 emission and absorption life cycle for precast concrete in Korea*. Sustainability, 2016. **8**(7): p. 663.
8. Xu, Z., S. Wang, and E. Wang, *Integration of BIM and energy consumption modelling for manufacturing prefabricated components: a case study in China*. Advances in Civil Engineering, 2019. **2019**.
9. SeaRates, *Route planner*. (Online). Available at: <https://www.searates.com/route-planner/> (Accessed 8 February 2020). 2020.
10. Shen, L., *The environmental impact assessment of whole life cycle of the construction project based on BIM technology*. MSc Thesis. Nanjing Forestry University., 2015.
11. Wang, Y., *Whole life cycle carbon emissions research of industrialized precast construction*. Southeast University: Nanjing, China, 2016: p. 221.
